# Supplementary material
Source: PubMed Central journal article supplement (PMC2912345)
Supplement: E10-03-0227_1.pdf [file E10-03-0227_1.pdf]

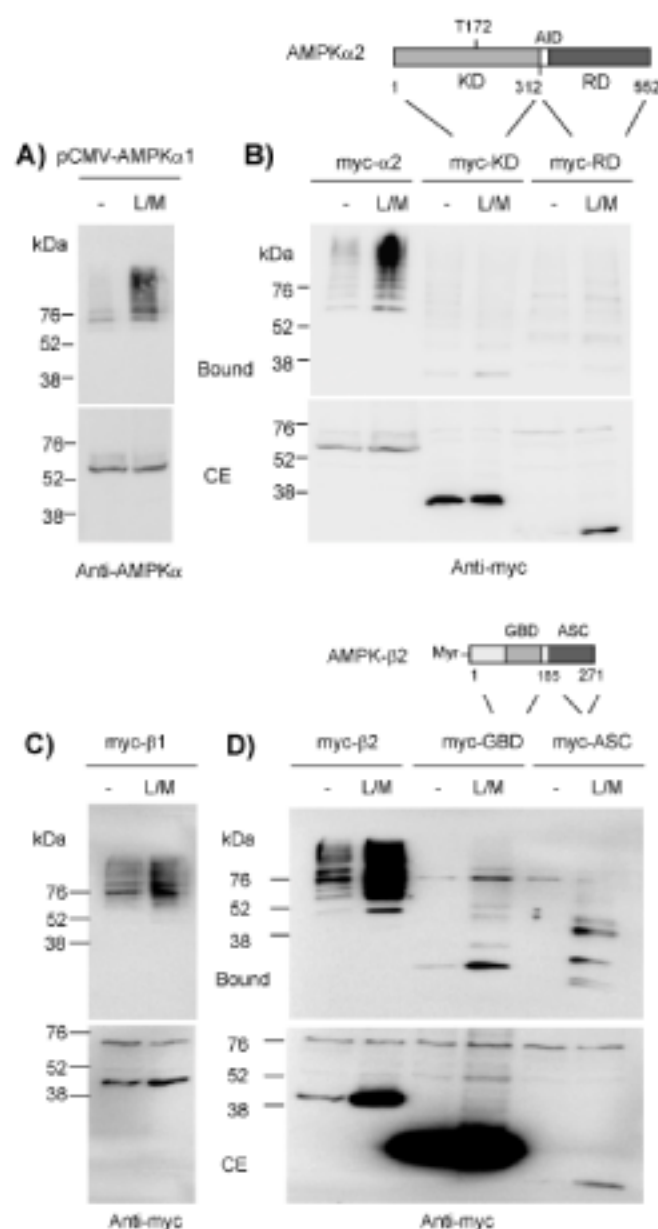

**Supplementary Fig. S1:** Analysis of the ubiquitination of AMPK $\alpha$  and  $\beta$  subunits by the laforin-malin complex. AMPK $\alpha$ 1 (A) and AMPK $\beta$ 1 (C) are also substrates for laforin-malin dependent ubiquitination. HEK293 cells were transfected with plasmids pCMV-His6xUbiq, pCMV-AMPK $\alpha$ 1 or pCMV-AMPK $\beta$ 1 with or without plasmids pCMV-HA-laforin and pcDNA3-HA-malin (L/M). Then, cell extracts were analyzed as in Fig. 1 using anti-AMPK $\alpha$  total (A) or anti-myc (C) antibodies. Mapping of the domains of AMPK $\alpha$ 2 (B) and AMPK $\beta$ 2 (D) involved in the laforin-malin dependent ubiquitination. HEK293 cells were transfected with plasmid pCMV-His6xUbiq and the indicated combination of plasmids (myc- $\alpha$ 2: pCMVmyc-AMPK $\alpha$ 2; myc-KD: pCMVmyc-AMPK $\alpha$ 2 KD; myc-RD: pCMVmyc-AMPK $\alpha$ 2 RD; myc- $\beta$ 2: pCMVmyc-AMPK $\beta$ 2; myc-GBD: pCMVmyc-AMPK $\beta$ 2 GBD; myc-ASC: pCMVmyc-AMPK $\beta$ 2 ASC; L/M: pCMV-HA-laforin/pcDNA3-HA-malin). Cell extracts were analyzed as in Fig 1 using anti-myc antibodies.

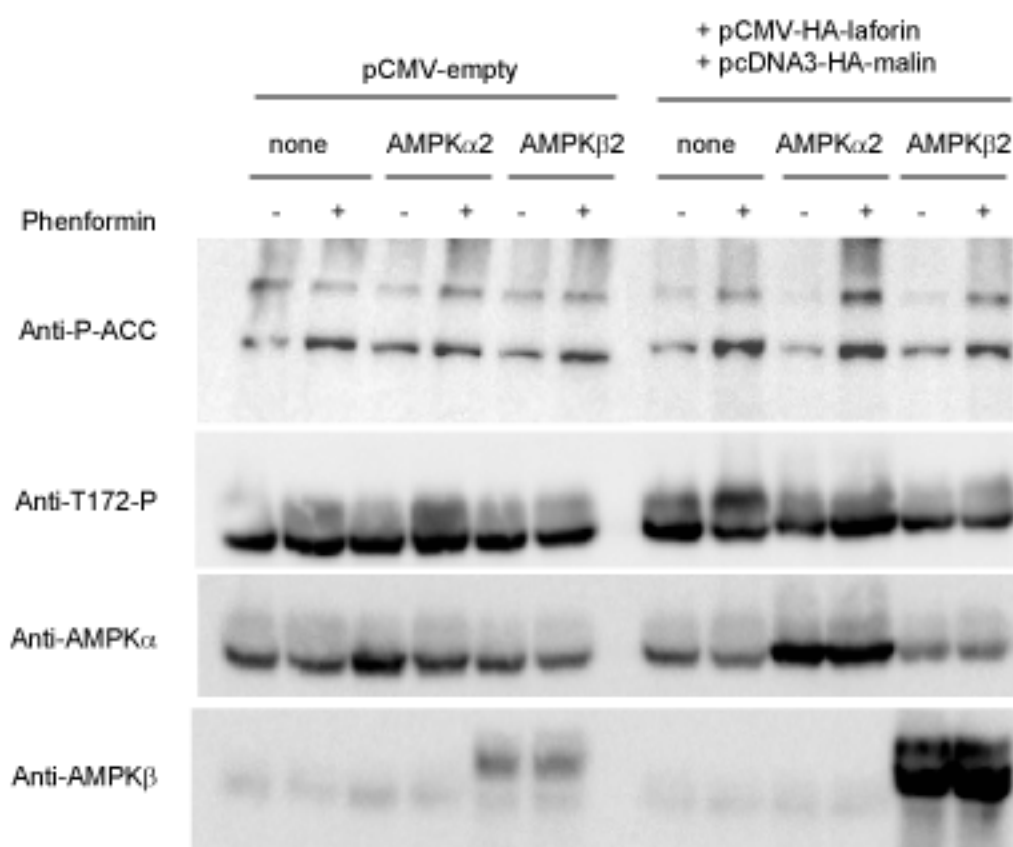

**Supplementary Fig. S2:** The expression of laforin and malin does not affect the activity of AMPK complex. HEK293 cells were co-transfected with plasmid pCMVmyc-AMPK $\alpha$ 2, pCMVmyc-AMPK $\beta$ 2 or pCMVmyc (none) and a combination or not of pCMV-HA-laforin and pcDNA3-HA-malin. After 24 hours of transfection, cells were treated or not with 5 mM phenformin for 1 hour. Cell extracts (25  $\mu$ g) were then analyzed by SDS-PAGE and Western blotting using the indicated antibodies. A representative Western blot is presented. Intensity of the P-ACC bands was measured and no statistically significant differences were found when comparing the cells transfected with the laforin/malin plasmids with the cells treated with an empty vector (n: 3).

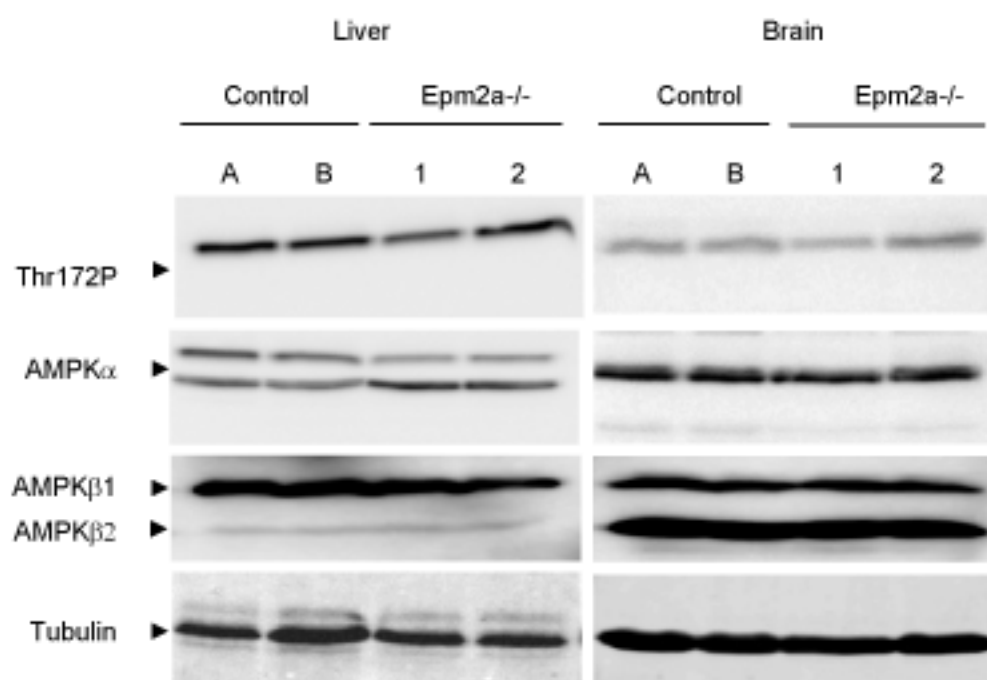

**Supplementary Fig. S3:** Laforin deletion does not affect expression of endogenous AMPK $\alpha$  and AMPK $\beta$  subunits or the regulation of AMPK $\alpha$ -Thr172 phosphorylation. Cell extracts (30  $\mu$ g) from liver and brain biopsies from two control (A and B) and two Epm2a<sup>-/-</sup> mice lacking laforin (1 and 2), were obtained as in *Vernia et al. 2009; PLoS ONE e5907* and analyzed by Western blotting using anti-Thr172P, anti-AMPK $\alpha$ , anti-AMPK $\beta$  and anti-Tubulin antibodies.
